# Supplementary material for: Asymmetric Lipid Transfer between Zwitterionic Vesicles by Nanoviscosity Measurements
Source: MDPI journal article supplement (doi:10.3390/nano11051087), 2021-04-22
Supplement: s1 [file s1]

# Asymmetric lipid transfer between zwitterionic vesicles by nanoviscosity measurements

Laure Bar <sup>1</sup>, George Cordoyiannis <sup>2</sup>, Shova Neupane <sup>3</sup>, Jonathan Goole <sup>4</sup>, Patrick Grosfils <sup>5</sup>, and Patricia Losada-Pérez <sup>1,\*</sup>

<sup>1</sup> Experimental Soft Matter and Thermal Physics group (EST), Department of Physics, Université Libre de Bruxelles, Boulevard du Triomphe CP223, 1050 Brussels, Belgium

<sup>2</sup> Condensed Matter Physics Department, Jožef Stefan Institute, Jamova 39, 1000 Ljubljana, Slovenia

<sup>3</sup> Physical Chemistry of Surfaces Group, Institut de Recherche de Chimie Paris (IRCP), 11 rue Pierre et Marie Curie, 75005 Paris, France

<sup>4</sup> Laboratory of Pharmaceutics and Biopharmaceutics, Université libre de Bruxelles, Campus de la Plaine, CP 207, Boulevard du Triomphe, Brussels, 1050, Belgium

<sup>5</sup> Center for Nonlinear Phenomena and Complex Systems, Department of Physics, Université Libre de Bruxelles, Boulevard du Triomphe CP223, 1050 Brussels, Belgium

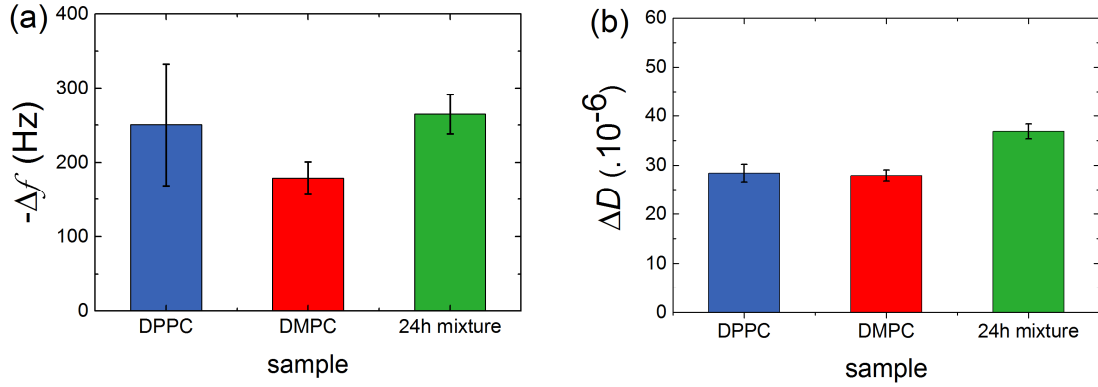

**Figure S1.** Frequency shifts (a) and dissipation shifts (b) for the third overtone observed during the adsorption of pure DMPC (red), pure DPPC (blue) and 24h DPPC/DMPC mixture (green) at 32°C on Au quartz sensors.

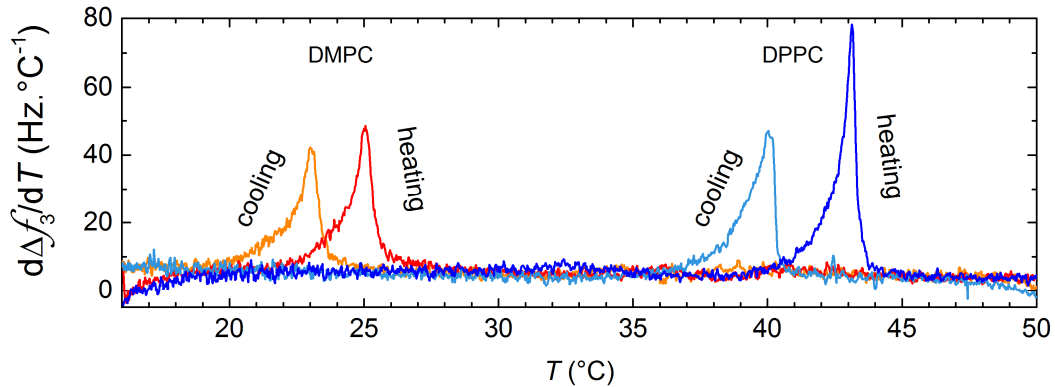

**Figure S2.** Temperature dependence of  $d\Delta f/dT$  (3<sup>rd</sup> overtone) upon cooling and heating for pure DMPC LUVs and pure DPPC LUVs adsorbed at 50°C on Au-coated quartz surfaces. Upon cooling the phase transitions occur at lower temperatures than upon heating. Here,  $|\Delta T_m(\text{DPPC})| = 3.1^\circ \text{C}$ , and  $|\Delta T_m(\text{DMPC})| = 2.1^\circ \text{C}$ .

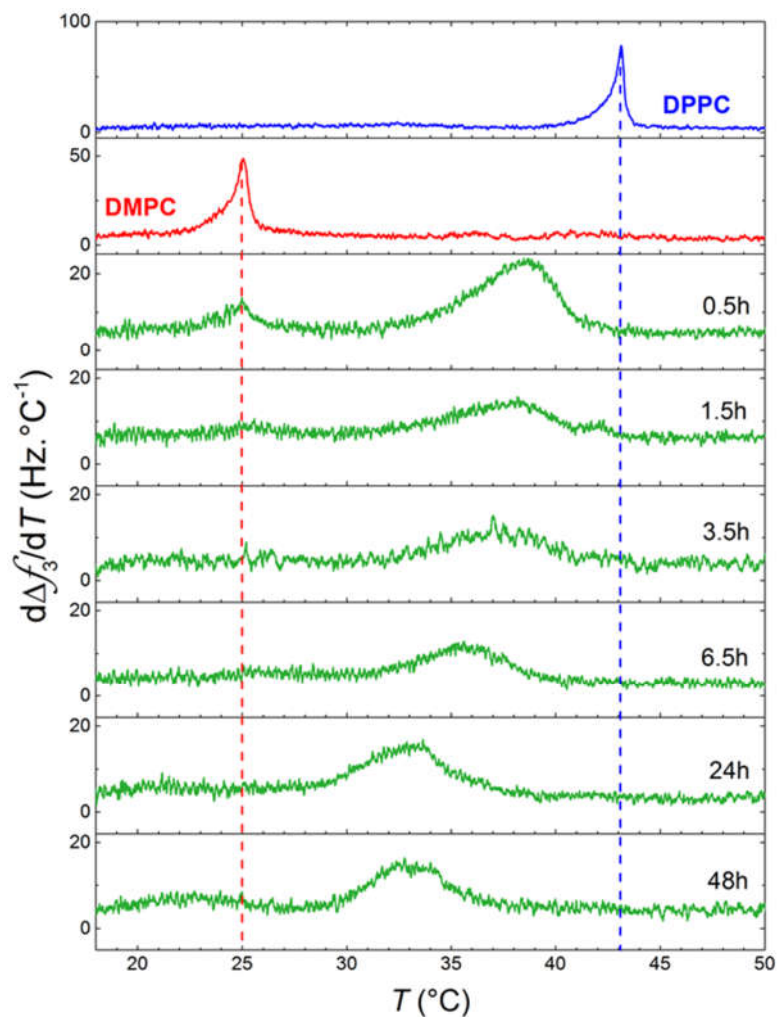

**Figure S3.** Dependence of the mixing time (30 min, 1h30, 3h30, 6h30, 24h, or 48h) on the main phase transition temperature of adsorbed vesicles on Au-coated quartz surfaces.  $d\Delta f_3/dT$  curves (for the 3<sup>rd</sup> overtone) obtained upon heating demonstrate the phase transitions of samples incubated at 50 °C.

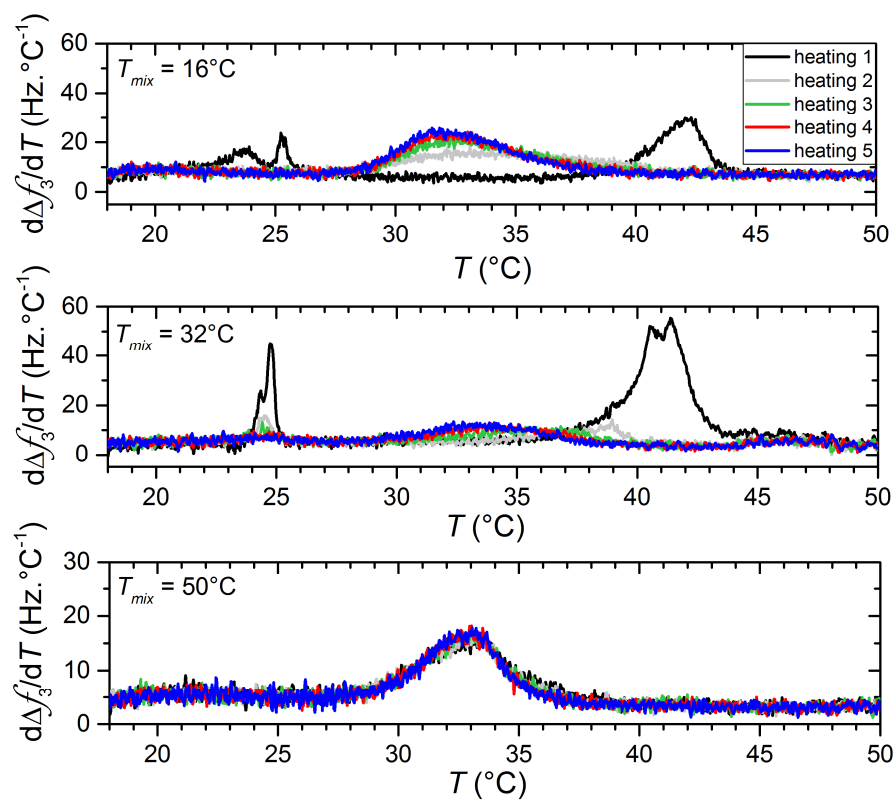

**Figure S4.**  $d\Delta f/dT$  curves obtained from successive heatings of the DPPC and DMPC vesicle dispersions incubated for 24h at  $T = 16^\circ\text{C}$  (top layer),  $T = 32^\circ\text{C}$  (middle layer), and  $T = 50^\circ\text{C}$  (bottom later).

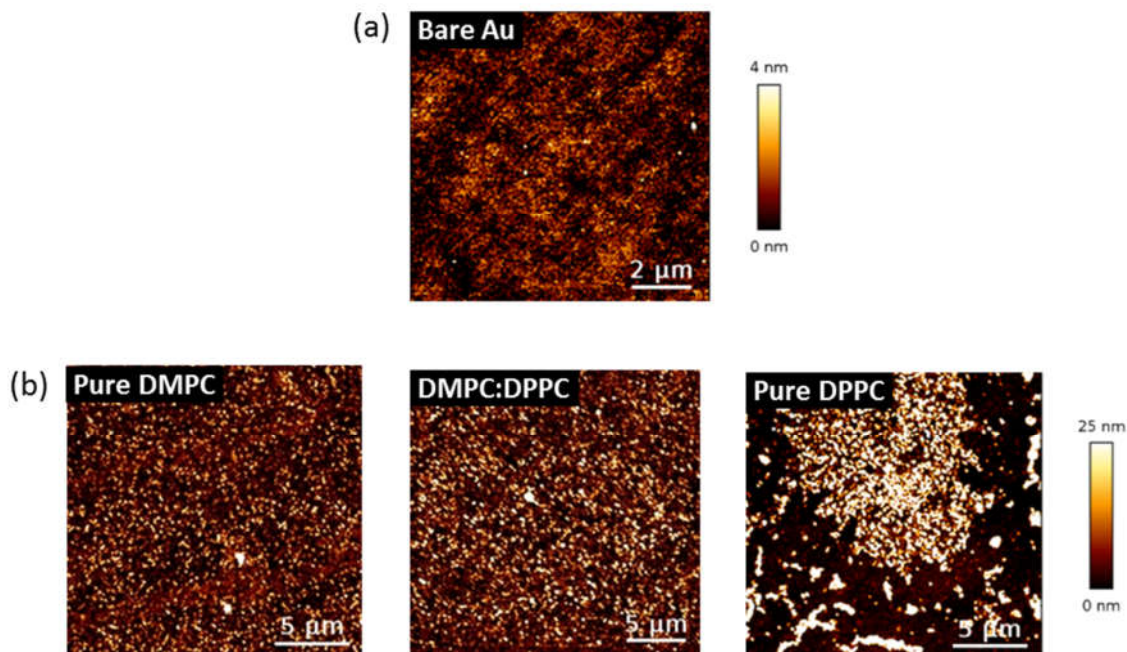

**Figure S5.** AFM height measured images taken on QCM-D quartz gold sensors : (a) is a bare Au used as reference, (b) is from left to the right pure DMPC, DMPC:DPPC incubated at 50 °C for 24 h and pure DPPC coated surfaces after thermal cycles.

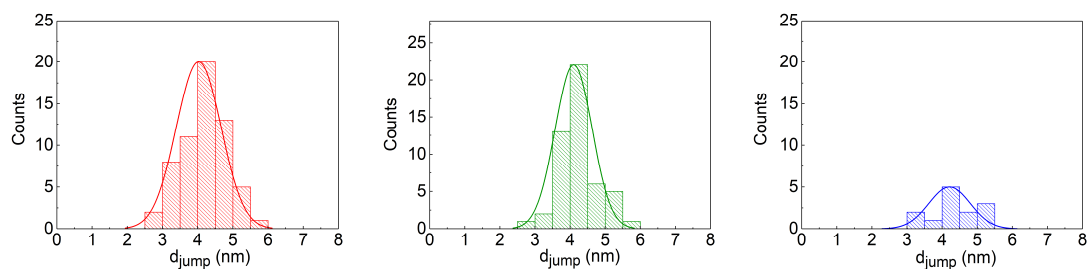

**Figure S6.** Statistical analysis of the jump thickness upon lipid bilayer perforation. The histograms correspond to a given number of force curves taken on DMPC (red solid line), DMPC:DPPC (green solid line) and DPPC (blue solid line) supported lipid bilayers on Au-coated QCM-D sensors.
